# Supplementary material for: Isolation of female germline stem cells from porcine ovarian tissue and differentiation into oocyte-like cells
Source: PubMed Central journal article supplement — J Reprod Dev. 2019 Aug 4;65(5):423–32. doi: 10.1262/jrd.2019-050 (PMC6815736; doi:10.1262/jrd.2019-050), 2019-08-04
Supplement: jrd-65-423-s001.pdf [file jrd-65-423-s001.pdf]

**Supplementary Table 1. Composition of the media used for culture of the isolated FGSCs**

| <b>Basal components</b>                                                                                                                                                                                                                                                                                                                                                              | <b>Growth factors</b>                                                      | <b>Supplement</b>            |
|--------------------------------------------------------------------------------------------------------------------------------------------------------------------------------------------------------------------------------------------------------------------------------------------------------------------------------------------------------------------------------------|----------------------------------------------------------------------------|------------------------------|
| 1. DMEM/F12 (Sigma Aldrich) supplemented with: insulin–transferrin–selenium A (1:100 dilution; Sigma Aldrich), 1 mM sodium pyruvate (Sigma-Aldrich), 3 mg/ml AlbuMAX I (Invitrogen), 2 mM L-glutamine (Sigma Aldrich), 0.1 mM 2-mercaptoethanol (Sigma Aldrich), 1 mM nonessential amino acids (Invitrogen), 60 µM putrescine (Sigma-Aldrich), penicillin/streptomycin (Invitrogen). | 20 ng/ml EGF<br>10 ng/ml bFGF<br>20 ng/ml GDNF<br>10 <sup>3</sup> U/ml LIF | 10% FBS                      |
| 2. DMEM/F12 (Sigma Aldrich) supplemented with: insulin–transferrin–selenium A (1:100 dilution; Sigma Aldrich), 1 mM sodium pyruvate (Sigma-Aldrich), 3 mg/ml AlbuMAX I (Invitrogen), 2 mM L-glutamine Sigma Aldrich), 0.1 mM 2-mercaptoethanol (Sigma Aldrich), 1 mM nonessential amino acids (Invitrogen), 60 µM putrescine (Sigma-Aldrich), penicillin/streptomycin (Invitrogen).  | 20 ng/ml EGF<br>10 ng/ml bFGF<br>20 ng/ml GDNF<br>10 <sup>3</sup> U/ml LIF | 2 %<br>N21-Max<br>supplement |

human bFGF (Sigma-Aldrich); recombinant rat GDNF (Sigma-Aldrich), mouse epidermal growth factor (Sigma-Aldrich), LIF (Sigma-Aldrich) and N21-Max Supplement (R&D Systems).

**Supplementary Table 2. Composition of the media used for *in vitro* differentiation culture of the isolated FGSCs into OLCs.**

| <b>Basal components</b>                                                                                                                                                                                                                                              | <b>Growth factors</b>                                                                                                            | <b>Supplement</b>                                    |
|----------------------------------------------------------------------------------------------------------------------------------------------------------------------------------------------------------------------------------------------------------------------|----------------------------------------------------------------------------------------------------------------------------------|------------------------------------------------------|
| DMEM/F12 (Sigma Aldrich) supplemented with insulin–transferrin–selenium A (1:100 dilution; Sigma Aldrich), 1 mM sodium pyruvate (Sigma-Aldrich), 2 mM L-glutamine (Sigma Aldrich), 1 mM nonessential amino acids (Invitrogen), penicillin/streptomycin (Invitrogen). | 20 ng/ml EGF<br>10 ng/ml bFGF<br>20 ng/ml GDNF<br>0.05 IU/ml FSH<br>0.03 IU/ml LH<br>1 µg/ml Estradiol<br>0.01 mM Dibutyryl cAMP | 5 % fetal bovine serum<br>5 % porcine follicle fluid |

Mouse epidermal growth factor (EGF) (Sigma-Aldrich), human basic fibroblast growth factor (bFGF) (Sigma-Aldrich); recombinant rat Glial cell line-derived neurotrophic factor GDNF (Sigma-Aldrich), follicle stimulation hormone (FSH) (Sigma-Aldrich), luteinizing hormone (LH) (Sigma-Aldrich), Estradiol (Sigma-Aldrich), Dibutyryl cyclic-AMP (Sigma-Aldrich)
